# Supplementary material
Source: HighWire-hosted journal article supplement (https://jnm.snmjournals.org/highwire/filestream/95534/field_highwire_adjunct_files/0/230318_Supplemental_Data.pdf)
Supplement: 230318_Supplemental_Data.pdf [file 230318_Supplemental_Data.pdf]

**Supplemental Table 1: PSMA PET/CT positivity stratified by PSA and scan indication**

|                                 | Any PSA (n= 388) |     |                          |      |     |     |              |     |
|---------------------------------|------------------|-----|--------------------------|------|-----|-----|--------------|-----|
|                                 | all              |     | initial staging (n = 93) |      | BCR |     | M1 restaging |     |
|                                 | n                | %   | n                        | %    | n   | %   | n            | %   |
| <b>68Ga-PSMA-11 PET/CT+</b>     | 321              | 83% | 93                       | 100% | 160 | 71% | 68           | 97% |
| Prostate/prostate bed (T+)      | 176              | 45% | 92                       | 99%  | 61  | 27% | 23           | 33% |
| Pelvic LN (N1)                  | 157              | 40% | 34                       | 37%  | 89  | 40% | 34           | 49% |
| Extrapelvic LN (M1a)            | 79               | 20% | 11                       | 12%  | 37  | 16% | 31           | 44% |
| Bone (M1b)                      | 105              | 27% | 12                       | 13%  | 44  | 20% | 49           | 70% |
| Visceral (M1c)                  | 27               | 7%  | 2                        | 2%   | 9   | 4%  | 16           | 23% |
| <b>68Ga-PSMA-11 TNM Pattern</b> |                  |     |                          |      |     |     |              |     |
| PSMA T+ N0 M0                   | 77               | 20% | 46                       | 49%  | 28  | 18% | 3            | 4%  |
| PSMA T0 N1 M0                   | 49               | 13% | 0                        | 0%   | 44  | 28% | 5            | 7%  |
| PSMA T+ N1 M0                   | 44               | 11% | 28                       | 30%  | 14  | 9%  | 2            | 3%  |
| PSMA T+ N0 M1                   | 28               | 7%  | 13                       | 14%  | 10  | 6%  | 5            | 7%  |
| PSMA T0 N0 M1                   | 59               | 15% | 0                        | 0%   | 33  | 21% | 26           | 38% |
| PSMA T0 N1 M1                   | 37               | 10% | 1                        | 1%   | 22  | 14% | 14           | 21% |
| PSMA T+ N1 M1                   | 27               | 7%  | 5                        | 5%   | 9   | 6%  | 13           | 19% |

**Supplemental Table 1: PSMA PET/CT positivity stratified by PSA and scan indication (con't)**

|                                 | PSA 0.04-5.0 (n=216) |     |                         |      |             |     |                       |     |
|---------------------------------|----------------------|-----|-------------------------|------|-------------|-----|-----------------------|-----|
|                                 | all (n=216)          |     | initial staging (n =12) |      | BCR (n=175) |     | M1 restaging (n = 29) |     |
|                                 | n                    | %   | n                       | %    | n           | %   | n                     | %   |
| <b>68Ga-PSMA-11 PET/CT+</b>     | 153                  | 71% | 12                      | 100% | 114         | 65% | 27                    | 93% |
| Prostate/prostate bed (T+)      | 62                   | 29% | 12                      | 100% | 40          | 23% | 10                    | 34% |
| Pelvic LN (N1)                  | 81                   | 38% | 3                       | 25%  | 67          | 38% | 11                    | 38% |
| Extrapelvic LN (M1a)            | 26                   | 12% | 1                       | 8%   | 17          | 10% | 8                     | 28% |
| Bone (M1b)                      | 38                   | 18% | 2                       | 17%  | 24          | 14% | 12                    | 41% |
| Visceral (M1c)                  | 9                    | 4%  | 0                       | 0%   | 7           | 4%  | 2                     | 7%  |
| <b>68Ga-PSMA-11 TNM Pattern</b> |                      |     |                         |      |             |     |                       |     |
| PSMA T+ N0 M0                   | 31                   | 14% | 6                       | 50%  | 22          | 13% | 3                     | 10% |
| PSMA T0 N1 M0                   | 46                   | 21% | 0                       | 0%   | 41          | 23% | 5                     | 17% |
| PSMA T+ N1 M0                   | 14                   | 6%  | 3                       | 25%  | 10          | 6%  | 1                     | 3%  |
| PSMA T+ N0 M1                   | 10                   | 5%  | 3                       | 25%  | 4           | 2%  | 3                     | 10% |
| PSMA T0 N0 M1                   | 31                   | 14% | 0                       | 0%   | 21          | 12% | 11                    | 38% |
| PSMA T0 N1 M1                   | 14                   | 6%  | 0                       | 0%   | 12          | 7%  | 2                     | 7%  |
| PSMA T+ N1 M1                   | 7                    | 3%  | 0                       | 0%   | 4           | 2%  | 3                     | 10% |

**Supplemental Table 1: PSMA PET/CT positivity stratified by PSA and scan indication (con't)**

|                                 | PSA 5.1-10.0 (n=64) |     |                        |      |            |     |                       |      |
|---------------------------------|---------------------|-----|------------------------|------|------------|-----|-----------------------|------|
|                                 | all (n=64)          |     | initial staging (n=26) |      | BCR (n=28) |     | M1 restaging (n = 10) |      |
|                                 | n                   | %   | n                      | %    | n          | %   | n                     | %    |
| <b>68Ga-PSMA-11 PET/CT+</b>     | 61                  | 95% | 26                     | 100% | 25         | 89% | 10                    | 100% |
| Prostate/prostate bed (T+)      | 39                  | 61% | 26                     | 100% | 13         | 46% | 0                     | 0%   |
| Pelvic LN (N1)                  | 28                  | 44% | 10                     | 38%  | 14         | 50% | 4                     | 40%  |
| Extrapelvic LN (M1a)            | 16                  | 25% | 4                      | 15%  | 6          | 21% | 6                     | 60%  |
| Bone (M1b)                      | 22                  | 34% | 1                      | 4%   | 12         | 43% | 9                     | 90%  |
| Visceral (M1c)                  | 2                   | 3%  | 0                      | 0%   | 0          | 0%  | 2                     | 20%  |
| <b>68Ga-PSMA-11 TNM Pattern</b> |                     |     |                        |      |            |     |                       |      |
| PSMA T+ N0 M0                   | 15                  | 23% | 12                     | 46%  | 3          | 11% | 0                     | 0%   |
| PSMA T0 N1 M0                   | 2                   | 3%  | 0                      | 0%   | 2          | 7%  | 0                     | 0%   |
| PSMA T+ N1 M0                   | 13                  | 20% | 9                      | 35%  | 4          | 14% | 0                     | 0%   |
| PSMA T+ N0 M1                   | 8                   | 13% | 4                      | 15%  | 4          | 14% | 0                     | 0%   |
| PSMA T0 N0 M1                   | 10                  | 16% | 0                      | 0%   | 4          | 14% | 6                     | 60%  |
| PSMA T0 N1 M1                   | 10                  | 16% | 0                      | 0%   | 6          | 21% | 4                     | 40%  |
| PSMA T+ N1 M1                   | 3                   | 5%  | 1                      | 4%   | 2          | 7%  | 0                     | 0%   |

**Supplemental Table 1: PSMA PET/CT positivity stratified by PSA and scan indication (con't)**

|                                 | PSA 10.1-20.0 (n=50) |     |                         |      |            |     |                       |      |
|---------------------------------|----------------------|-----|-------------------------|------|------------|-----|-----------------------|------|
|                                 | all (n=49)           |     | initial staging (n =22) |      | BCR (n=17) |     | M1 restaging (n = 10) |      |
|                                 | n                    | %   | n                       | %    | n          | %   | n                     | %    |
| <b>68Ga-PSMA-11 PET/CT+</b>     | 48                   | 98% | 22                      | 100% | 16         | 94% | 10                    | 100% |
| Prostate/prostate bed (T+)      | 34                   | 69% | 22                      | 100% | 7          | 41% | 5                     | 50%  |
| Pelvic LN (N1)                  | 17                   | 35% | 6                       | 27%  | 4          | 24% | 7                     | 70%  |
| Extrapelvic LN (M1a)            | 19                   | 39% | 3                       | 14%  | 10         | 59% | 6                     | 60%  |
| Bone (M1b)                      | 20                   | 41% | 3                       | 14%  | 7          | 41% | 10                    | 100% |
| Visceral (M1c)                  | 6                    | 12% | 0                       | 0%   | 1          | 6%  | 5                     | 50%  |
| <b>68Ga-PSMA-11 TNM Pattern</b> |                      |     |                         |      |            |     |                       |      |
| PSMA T+ N0 M0                   | 15                   | 31% | 12                      | 55%  | 3          | 18% | 0                     | 0%   |
| PSMA T0 N1 M0                   | 1                    | 2%  | 0                       | 0%   | 1          | 6%  | 0                     | 0%   |
| PSMA T+ N1 M0                   | 5                    | 10% | 5                       | 23%  | 0          | 0%  | 0                     | 0%   |
| PSMA T+ N0 M1                   | 6                    | 12% | 4                       | 18%  | 2          | 12% | 0                     | 0%   |
| PSMA T0 N0 M1                   | 10                   | 20% | 0                       | 0%   | 7          | 41% | 3                     | 30%  |
| PSMA T0 N1 M1                   | 3                    | 6%  | 0                       | 0%   | 1          | 6%  | 2                     | 20%  |
| PSMA T+ N1 M1                   | 8                    | 16% | 1                       | 5%   | 2          | 12% | 5                     | 50%  |

**Supplemental Table 1: PSMA PET/CT positivity stratified by PSA and scan indication (con't)**

|                                 | PSA >20.0 (n=58) |     |                         |      |           |      |                       |      |
|---------------------------------|------------------|-----|-------------------------|------|-----------|------|-----------------------|------|
|                                 | all (n=58)       |     | initial staging (n =33) |      | BCR (n=5) |      | M1 restaging (n = 20) |      |
|                                 | n                | %   | n                       | %    | n         | %    | n                     | %    |
| <b>68Ga-PSMA-11 PET/CT+</b>     | 57               | 98% | 33                      | 100% | 5         | 100% | 20                    | 100% |
| Prostate/prostate bed (T+)      | 40               | 69% | 32                      | 97%  | 1         | 20%  | 7                     | 35%  |
| Pelvic LN (N1)                  | 30               | 52% | 15                      | 45%  | 4         | 80%  | 11                    | 35%  |
| Extrapelvic LN (M1a)            | 18               | 31% | 3                       | 9%   | 4         | 80%  | 11                    | 35%  |
| Bone (M1b)                      | 24               | 41% | 6                       | 18%  | 1         | 20%  | 17                    | 35%  |
| Visceral (M1c)                  | 10               | 17% | 2                       | 6%   | 1         | 20%  | 7                     | 35%  |
| <b>68Ga-PSMA-11 TNM Pattern</b> |                  |     |                         |      |           |      |                       |      |
| PSMA T+ N0 M0                   | 16               | 28% | 16                      | 48%  | 0         | 0%   | 0                     | 0%   |
| PSMA T0 N1 M0                   | 0                | 0%  | 0                       | 0%   | 0         | 0%   | 0                     | 0%   |
| PSMA T+ N1 M0                   | 12               | 21% | 11                      | 33%  | 0         | 0%   | 1                     | 5%   |
| PSMA T+ N0 M1                   | 4                | 7%  | 2                       | 6%   | 0         | 0%   | 2                     | 10%  |
| PSMA T0 N0 M1                   | 8                | 14% | 0                       | 0%   | 1         | 20%  | 7                     | 35%  |
| PSMA T0 N1 M1                   | 10               | 17% | 1                       | 3%   | 3         | 60%  | 6                     | 30%  |
| PSMA T+ N1 M1                   | 8                | 14% | 3                       | 9%   | 1         | 20%  | 4                     | 20%  |

**Supplemental Table 2: PSMA PET/CT positive bone lesions stratified by PSA and scan indication**

|                              | Any PSA M1b+ (n = 105) |     |                          |     |     |          |                   |     |
|------------------------------|------------------------|-----|--------------------------|-----|-----|----------|-------------------|-----|
|                              | all (n= 105)           |     | initial staging (n = 12) |     | BCR | (n = 44) | M1 restaging (n = |     |
|                              | n                      | %   | n                        | %   | n   | %        | n                 | %   |
| Pelvis                       | 73                     | 70% | 9                        | 75% | 22  | 50%      | 42                | 86% |
| Ribs/Clavicles/Sternum       | 62                     | 59% | 6                        | 50% | 19  | 43%      | 37                | 76% |
| Spine                        | 60                     | 57% | 5                        | 42% | 17  | 39%      | 38                | 78% |
| Proximal third of femur      | 29                     | 28% | 1                        | 8%  | 2   | 5%       | 26                | 53% |
| Humerus                      | 28                     | 27% | 2                        | 17% | 5   | 11%      | 21                | 43% |
| Skull base                   | 19                     | 18% | 0                        | 0%  | 2   | 5%       | 17                | 35% |
| Superior skull               | 18                     | 17% | 1                        | 8%  | 3   | 7%       | 14                | 29% |
| Lower extremities below prox | 18                     | 17% | 0                        | 0%  | 2   | 5%       | 16                | 33% |

**Supplemental Table 2: PSMA PET/CT positive bone lesions stratified by PSA and scan indication (con't)**

|                              | PSA 0.04-5.0 M1b+ (n=38) |     |                         |     |     |          |                   |     |
|------------------------------|--------------------------|-----|-------------------------|-----|-----|----------|-------------------|-----|
|                              | all (n=38 )              |     | initial staging (n =2 ) |     | BCR | (n =24 ) | M1 restaging (n = |     |
|                              | n                        | %   | n                       | %   | n   | %        | n                 | %   |
| Pelvis                       | 19                       | 50% | 1                       | 50% | 9   | 38%      | 9                 | 75% |
| Ribs/Clavicles/Sternum       | 16                       | 42% | 1                       | 50% | 9   | 38%      | 6                 | 50% |
| Spine                        | 17                       | 45% | 1                       | 50% | 8   | 33%      | 8                 | 67% |
| Proximal third of femur      | 4                        | 11% | 0                       | 0%  | 1   | 4%       | 3                 | 25% |
| Humerus                      | 2                        | 5%  | 0                       | 0%  | 0   | 0%       | 2                 | 17% |
| Skull base                   | 2                        | 5%  | 0                       | 0%  | 1   | 4%       | 1                 | 8%  |
| Superior skull               | 1                        | 3%  | 0                       | 0%  | 0   | 0%       | 1                 | 8%  |
| Lower extremities below prox | 2                        | 5%  | 0                       | 0%  | 1   | 4%       | 1                 | 8%  |

**Supplemental Table 2: PSMA PET/CT positive bone lesions stratified by PSA and scan indication (con't)**

|                              | PSA 5.1-10.0 M1b+(n= ) |     |                        |      |     |          |   |              |   |        |
|------------------------------|------------------------|-----|------------------------|------|-----|----------|---|--------------|---|--------|
|                              | all (n=22)             |     | initial staging (n =1) |      | BCR | (n = 12) |   | M1 restaging |   | (n =9) |
|                              | n                      | %   | n                      | %    | n   | %        | n | %            | n | %      |
| Pelvis                       | 17                     | 77% | 1                      | 100% | 8   | 67%      | 8 | 89%          |   |        |
| Ribs/Clavicles/Sternum       | 11                     | 50% | 0                      | 0%   | 5   | 42%      | 6 | 67%          |   |        |
| Spine                        | 10                     | 45% | 0                      | 0%   | 4   | 33%      | 6 | 67%          |   |        |
| Proximal third of femur      | 4                      | 18% | 0                      | 0%   | 0   | 0%       | 4 | 44%          |   |        |
| Humerus                      | 6                      | 27% | 0                      | 0%   | 2   | 17%      | 4 | 44%          |   |        |
| Skull base                   | 4                      | 18% | 0                      | 0%   | 0   | 0%       | 4 | 44%          |   |        |
| Superior skull               | 2                      | 9%  | 0                      | 0%   | 1   | 8%       | 1 | 11%          |   |        |
| Lower extremities below prox | 2                      | 9%  | 0                      | 0%   | 0   | 0%       | 2 | 22%          |   |        |

**Supplemental Table 2: PSMA PET/CT positive bone lesions stratified by PSA and scan indication (con't)**

|                              | PSA 10.1-20.0 M1b+(n=20) |     |                        |     |     |        |   |              |   |         |
|------------------------------|--------------------------|-----|------------------------|-----|-----|--------|---|--------------|---|---------|
|                              | all (n=20)               |     | initial staging (n =3) |     | BCR | (n =7) |   | M1 restaging |   | (n =10) |
|                              | n                        | %   | n                      | %   | n   | %      | n | %            | n | %       |
| Pelvis                       | 16                       | 80% | 2                      | 67% | 5   | 71%    | 9 | 90%          |   |         |
| Ribs/Clavicles/Sternum       | 14                       | 70% | 2                      | 67% | 5   | 71%    | 7 | 70%          |   |         |
| Spine                        | 14                       | 70% | 1                      | 33% | 4   | 57%    | 9 | 90%          |   |         |
| Proximal third of femur      | 8                        | 40% | 0                      | 0%  | 1   | 14%    | 7 | 70%          |   |         |
| Humerus                      | 9                        | 45% | 1                      | 33% | 3   | 43%    | 5 | 50%          |   |         |
| Skull base                   | 4                        | 20% | 0                      | 0%  | 1   | 14%    | 3 | 30%          |   |         |
| Superior skull               | 7                        | 35% | 1                      | 33% | 2   | 29%    | 4 | 40%          |   |         |
| Lower extremities below prox | 6                        | 30% | 0                      | 0%  | 1   | 14%    | 5 | 50%          |   |         |

**Supplemental Table 2: PSMA PET/CT positive bone lesions stratified by PSA and scan indication (con't)**

|                              | PSA >20.0 M1b+(n=24) |     |                        |     |            |      |                      |      |  |  |
|------------------------------|----------------------|-----|------------------------|-----|------------|------|----------------------|------|--|--|
|                              | all (n=24)           |     | initial staging (n =6) |     | BCR (n =1) |      | M1 restaging (n =17) |      |  |  |
|                              | n                    | %   | n                      | %   | n          | %    | n                    | %    |  |  |
| Pelvis                       | 20                   | 83% | 5                      | 83% | 0          | 0%   | 15                   | 88%  |  |  |
| Ribs/Clavicles/Sternum       | 20                   | 83% | 3                      | 50% | 0          | 0%   | 17                   | 100% |  |  |
| Spine                        | 18                   | 75% | 3                      | 50% | 1          | 100% | 14                   | 82%  |  |  |
| Proximal third of femur      | 12                   | 50% | 1                      | 17% | 0          | 0%   | 11                   | 65%  |  |  |
| Humerus                      | 11                   | 46% | 1                      | 17% | 0          | 0%   | 10                   | 59%  |  |  |
| Skull base                   | 9                    | 38% | 0                      | 0%  | 0          | 0%   | 9                    | 53%  |  |  |
| Superior skull               | 8                    | 33% | 0                      | 0%  | 0          | 0%   | 8                    | 47%  |  |  |
| Lower extremities below prox | 8                    | 33% | 0                      | 0%  | 0          | 0%   | 8                    | 47%  |  |  |
